# Supplementary material for: Insertion of a knockout-first cassette in Ampd1 gene leads to neonatal death by disruption of neighboring genes expression
Source: PubMed Central journal article supplement (PMC5075929; doi:10.1038/srep35970), 2016-10-24
Supplement: srep35970-s1.pdf [file srep35970-s1.pdf]

**Insertion of a knockout-first cassette in *Ampd1* gene leads to neonatal death by  
disruption of neighboring genes expression**

Yongcheng Pan<sup>1,2#</sup>, Lusi Zhang<sup>1,3#</sup>, Qiong Liu<sup>1</sup>, Ying Li<sup>1</sup>, Hui Guo<sup>1</sup>, Yu Peng<sup>1</sup>,  
Hexiang Peng<sup>1</sup>, Beisha Tang<sup>1,2,4</sup>, Zhengmao Hu<sup>1</sup>, Jingping Zhao<sup>5</sup>, Kun Xia<sup>1, 6, 7\*</sup>,  
Jia-Da Li<sup>1,7\*</sup>

**Supplementary Information**

**Supplementary Table 1: Differentially expressed genes identified by RNA sequencing and RT-PCR verification.**

| Gene          | Chr/Strand | Start/End           | RNA seq        |           | RT-PCR          |         |
|---------------|------------|---------------------|----------------|-----------|-----------------|---------|
|               |            |                     | Value of WT    | p-adjust  | Value of WT     | p-value |
| <i>Man1a2</i> | 3/-        | 100562208/100685503 | 18.07% ±2.30%  | 9.070E-53 | 24.37% ±2.19%   | 0.0001  |
| <i>Ptgfrn</i> | 3/-        | 101040232/101110278 | 100.33% ±5.80% | 1         | 107.37% ±23.93% | 0.7776  |
| <i>Igsf3</i>  | 3/+        | 101377125/101463060 | 101.78% ±4.13% | 1         | 103.57% ±19.44% | 0.8723  |
| <i>Atp1a1</i> | 3/-        | 101576219/101604603 | 113.65% ±0.79% | 1         | 115.33% ±14.01% | 0.4038  |
| <i>Casq2</i>  | 3/+        | 102086415/102146514 | 84.78% ±7.41%  | 1         | 80.17% ±16.35%  | 0.4416  |
| <i>Csde1</i>  | 3/+        | 103020546/103058189 | 101.64% ±7.75% | 1         | 86.48% ±10.34%  | 0.1547  |
| <i>Nras</i>   | 3/+        | 103058339/103067914 | 63.63% ±5.43%  | 3.314E-04 | 50.85% ±5.53%   | 0.0037  |
| <i>Ampd1</i>  | 3/+        | 103074014/103099714 | 0.16% ±0.04%   | 6.089E-38 | 0.11% ±0.16%    | 0.0003  |

In RNA sequencing, muscle tissue come from E18.5 WT mice (n=3) and *Ampd1<sup>tmla/tmla</sup>* mice (n=3). The P-values were adjusted using the Benjamini and Hochberg's approach for controlling the false discovery rate. Another group of E18.5 WT mice (n=5) and *Ampd1<sup>tmla/tmla</sup>* mice (n=5) muscle were used for RT-PCR. Two-tailed Student's *t* test was used to determine the significance of differences, mean ± SEM.

**Supplementary Table 2: Genotyping primers and PCR products size of different *Ampd1* mice.**

| Allele                       | Primer  | Sequence(5'-3')            | Product size(bp)                                      |
|------------------------------|---------|----------------------------|-------------------------------------------------------|
| <i>Ampd1</i> <sup>tm1a</sup> | WT-F    | tgggctgacagctgcagttagca    | WT:354bp<br>tm1a/+:354bp & 410bp<br>tm1a/tm1a:410bp   |
|                              | loxP-F  | gagatggcgcaacgcaattaat     |                                                       |
|                              | Tm1a-R  | ccaagaaaaagacagcacaggagacc |                                                       |
| <i>Ampd1</i> <sup>tm1c</sup> | Tm1c-F: | ggcaactccctttaccaca        | WT:352bp<br>tm1c/+:516bp & 352bp<br>tm1c/tm1c:516bp   |
|                              | Tm1c-R  | tttcctgatctccaaccag        |                                                       |
| <i>Ampd1</i> <sup>tm1d</sup> | Tm1d-F  | ggcaactccctttaccaca        | WT:1090bp<br>tm1d/+:1090bp & 400bp<br>tm1d/tm1d:400bp |
|                              | Tm1d-R  | ggtaacacgcatgacaggtg       |                                                       |

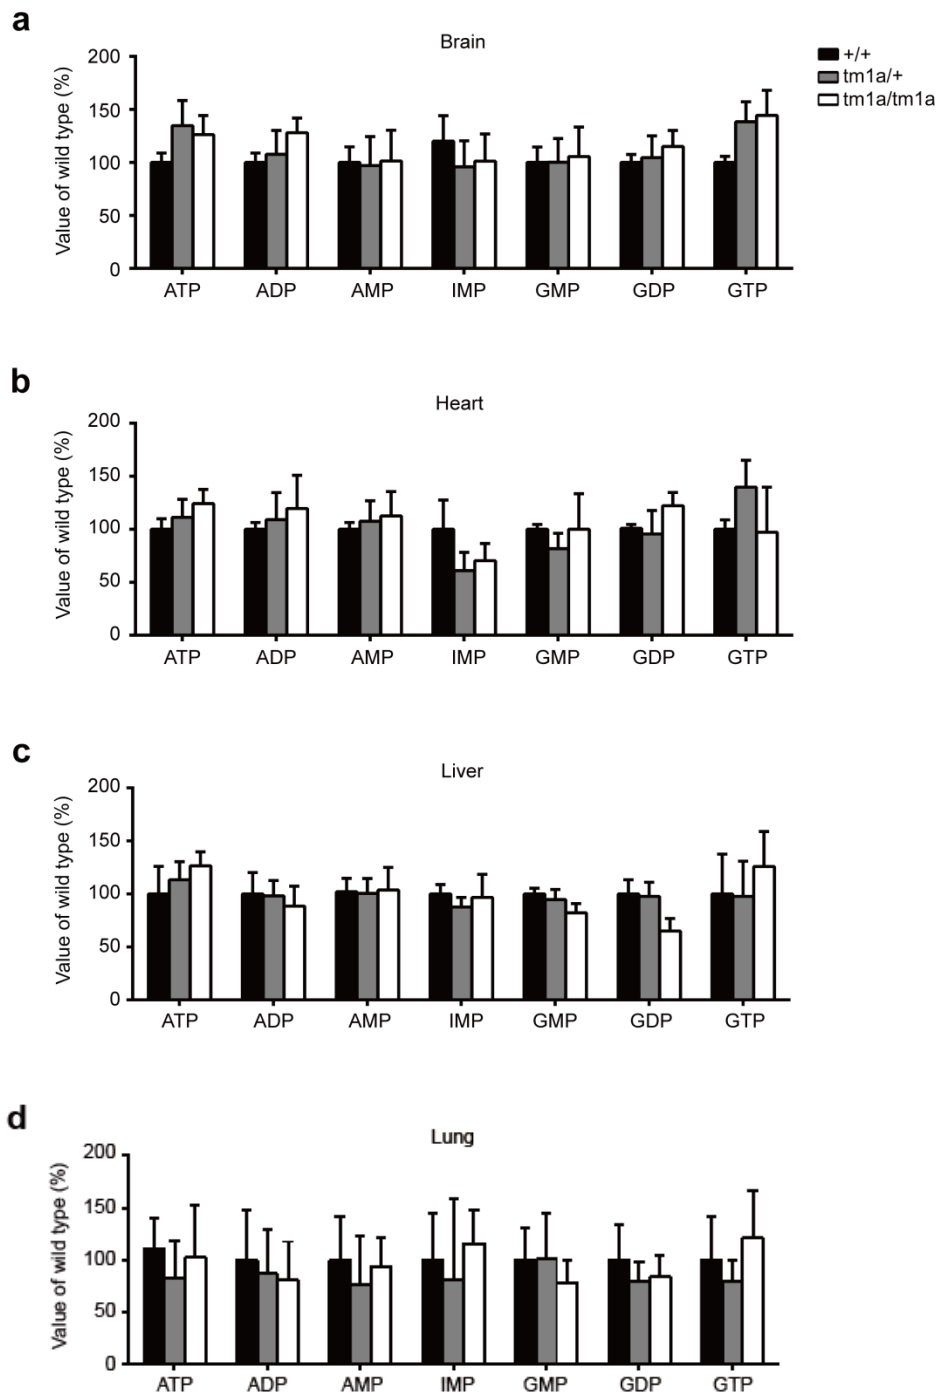

**Supplementary Figure 1: Nucleotide levels in the brain, the heart and the liver of E18.5 mice.** There is no genotypic difference in the nucleotide levels of the brain (a), the heart (b), the liver (c) and the lung (d) in E18.5 *Ampd1*<sup>tm1a/tm1a</sup> mice. n=5/each genotype, mean ± SEM.

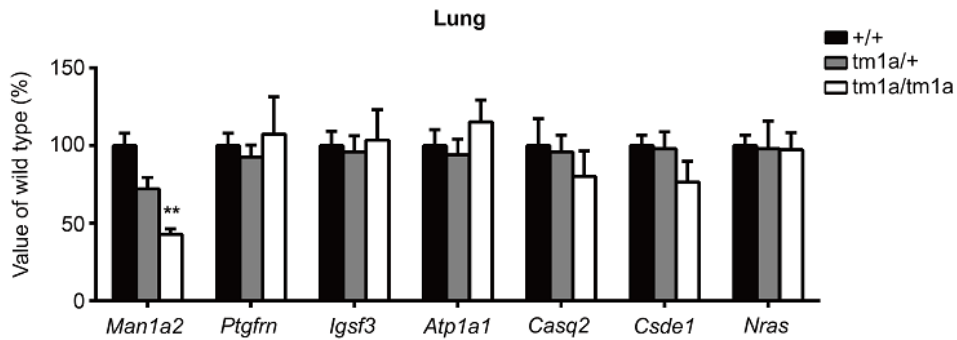

**Supplementary Figure 2:** RNA level of different genes, which located between *Ampd1* and *Man1a2*, in the lung of *Ampd1<sup>tm1a/tm1a</sup>* mice. *Man1a2* expression level was significantly decreased to 42.69%  $\pm$  3.52% in lung of *Ampd1<sup>tm1a/tm1a</sup>* mice, but the expression of genes located between *Man1a2* and *Ampd1* (*Ptgfrn*, *Igsf3*, *Atp1a2*, *Casq2*, *Csde1* and *Nras*) did not change in lung (n=5/each genotype, mean  $\pm$  SEM. As compared with WT, \*\*P<0.01, two-way ANNOVA followed with Bonferroni's multiple comparisons test).

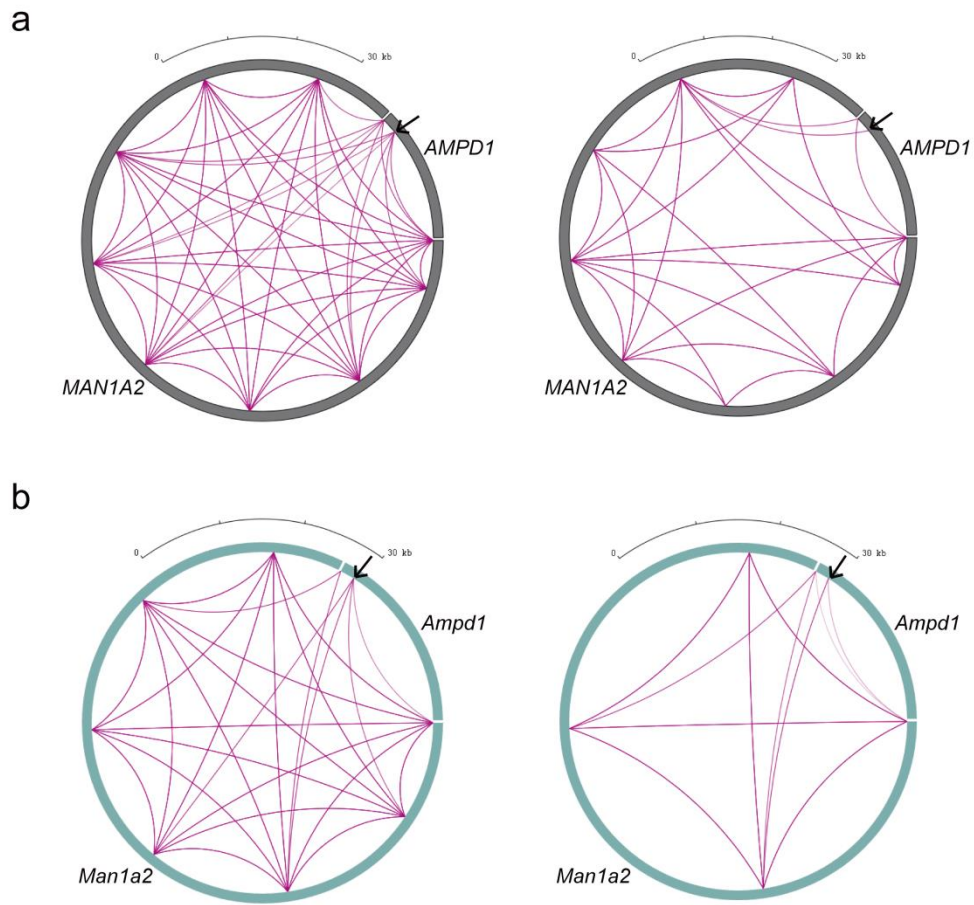

**Supplementary Figure 3: Potential long range interactions between *Ampd1* and *Man1a2* gene.** Hi-C results hosted in WashU Epigenome Browser indicated probable long range interaction between *Ampd1* and *Man1a2* in (a) human H1 embryonic stem cell or (b) mouse embryonic stem cell. Purple arc represented Long range interaction.
